# Supplementary material for: Polymeric indoximod based prodrug nanoparticles with doxorubicin entrapment for inducing immunogenic cell death and improving the immunotherapy of breast cancer
Source: Royal Society of Chemistry journal article supplement (doi:10.1039/d2tb00197g), 2022-01-01
Supplement: d2tb00197g1.pdf [file d2tb00197g1.pdf]

# Polymeric Indoximod Based Prodrug Nanoparticles with Doxorubicin entrapment for Inducing Immunogenic Cell Death and Improving Immunotherapy for Breast cancer

Xinlong Zang<sup>a\*</sup>, Jinxiao Song<sup>a</sup>, Xie yi<sup>a</sup> and Piyu-Jiang<sup>b</sup>

a. School of Basic Medical, Qingdao University, Ningxia Road 308, Qingdao, China

b. Cangzhou Central Hospital, Xinhua West Road 16, Cangzhou, China

## Supporting Information

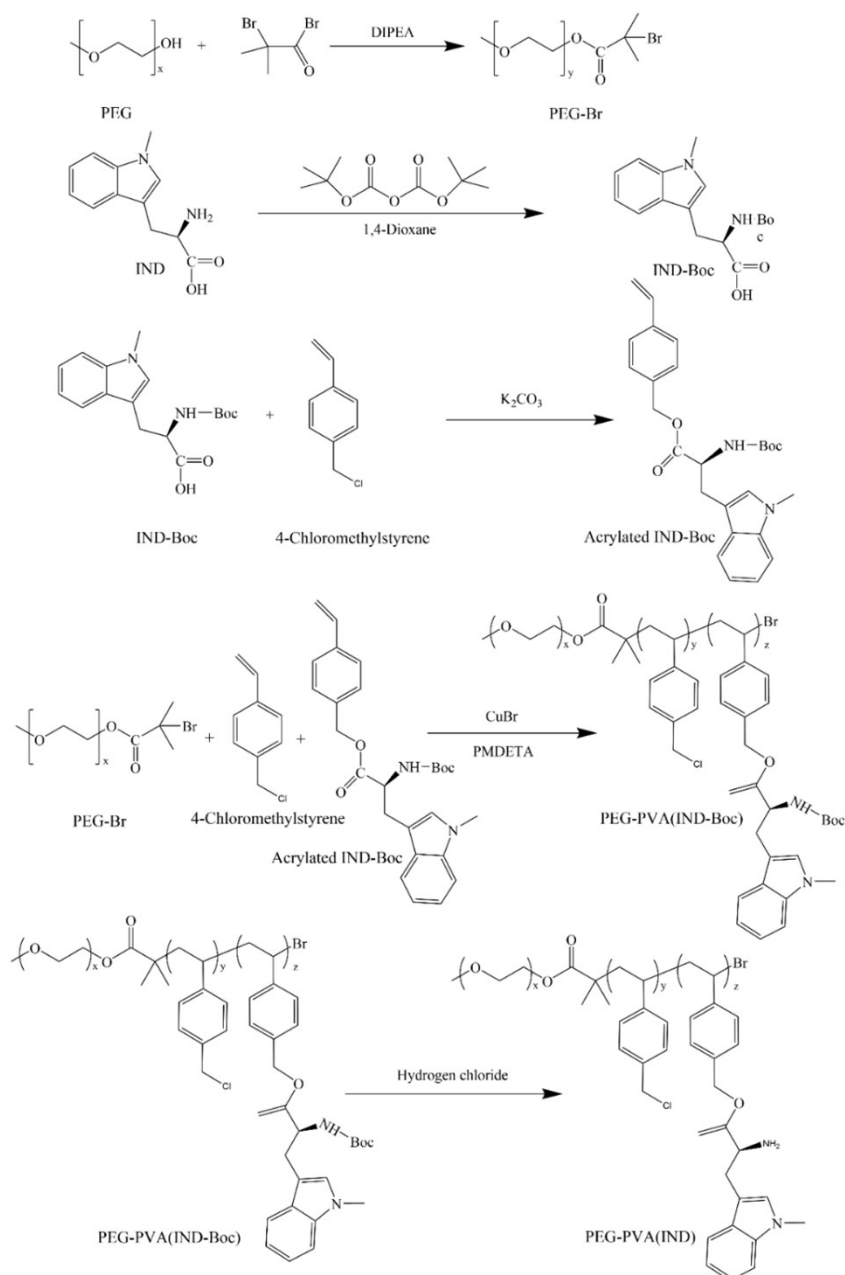

**Figure S1.** Schematic synthesis of PEG-PVA(IND).

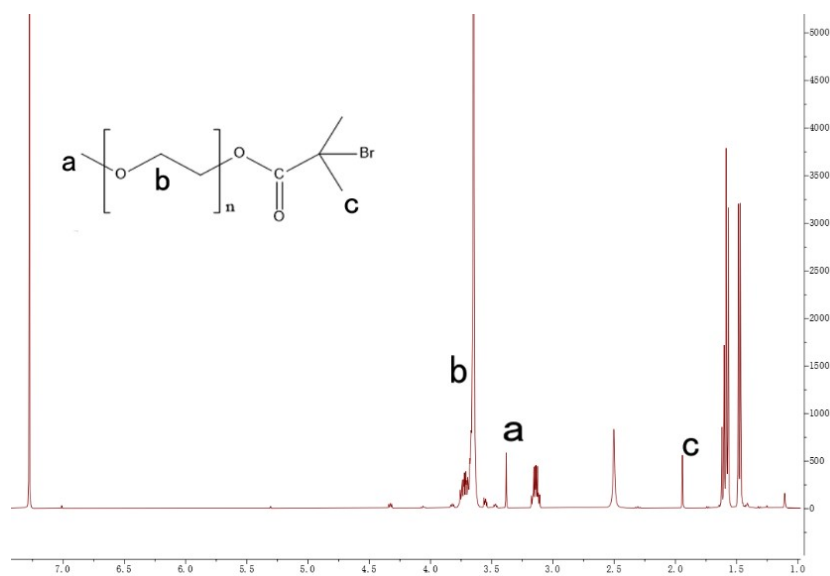

**Figure S2.**  $^1\text{H}$  NMR spectrum of PEG-Br.

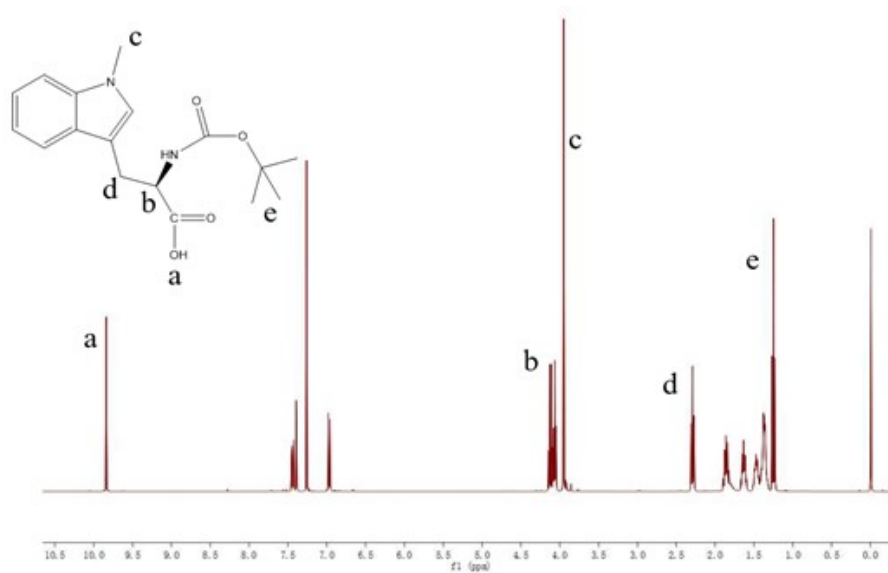

**Figure S3.**  $^1\text{H}$  NMR spectrum of IND-Boc.

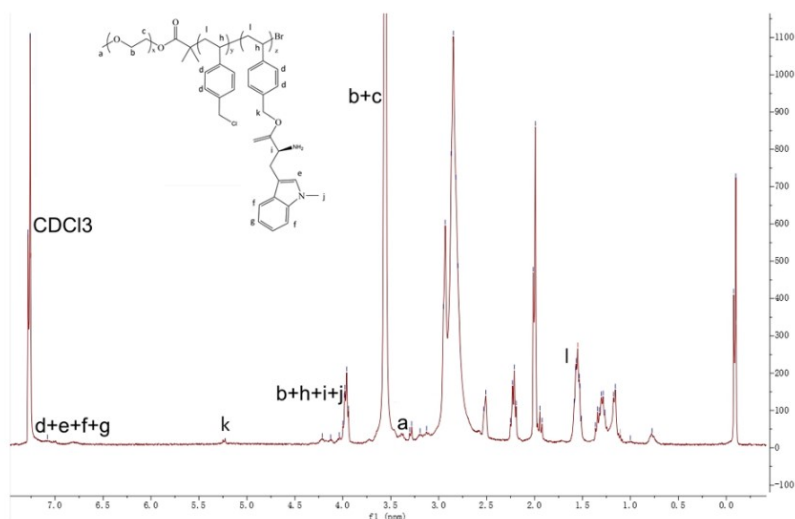

**Figure S4.**  $^1\text{H}$  NMR spectrum of PEG-PVA(IND).

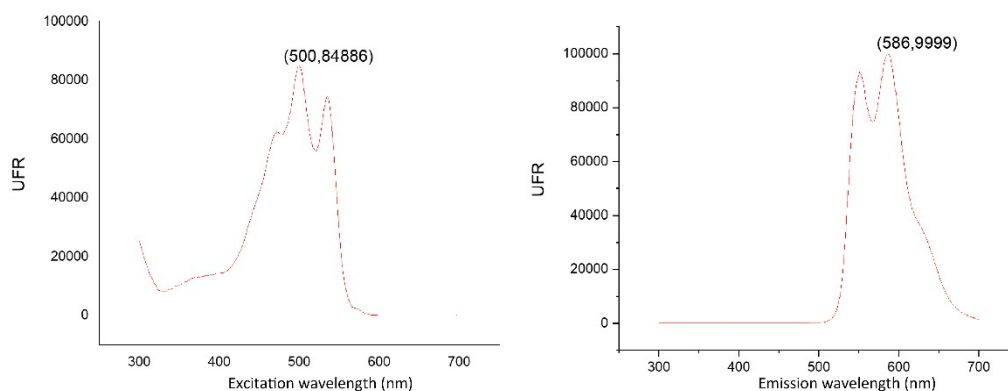

**Figure S5.** The excitation and emission wavelength of DOX.

**Table S1.** Particle size changes during 5 days at room temperature (n=3).

| Formulations | Particle size at 0 <sup>th</sup> day (nm) | Particle size at 5 <sup>th</sup> day (nm) |
|--------------|-------------------------------------------|-------------------------------------------|
| IND@NPs      | 98.2 ± 0.29                               | 105.2±5.2                                 |
| DOX/IND@NPs  | 104 ± 3.21                                | 110.7±4.92                                |

**Table S2.** Particle size and zeta potential of DOX/IND@NPs and DiR labelled IND@NPs.

| Formulations | Particle size (nm) | Zeta potential (mV) |
|--------------|--------------------|---------------------|
| DOX/IND@NPs  | 104 ± 3.21         | -7.58 ± 2.34        |
| DiR/IND@NPs  | 102.2±4.56         | -6.65±1.43          |
